# Supplementary material for: Wavefront-enhanced laser-induced breakdown spectroscopy (WELIBS) with lasers at multi-wavelengths via crystalline quartz
Source: Royal Society of Chemistry journal article supplement (doi:10.1039/d4ja00070f), 2024-01-01
Supplement: d4ja00070f1.pdf [file d4ja00070f1.pdf]

Table 1.S: The elemental composition of the samples under investigation.

| Sample | Cu%   | Zn%   | Pb%  | Sn%  |
|--------|-------|-------|------|------|
| CNR4   | 82.50 | 14.00 | 0.50 | 3.00 |
| CNR5   | 87.30 | 3.70  | 2.70 | 6.30 |
| CNR6   | 83.82 | 4.50  | 5.66 | 5.49 |
| CNR160 | 85.00 | 2.00  | 6.50 | 6.50 |
| CNR161 | 86.00 | 6.00  | 4.00 | 4.00 |
| CNR164 | 88.00 | 8.00  | 2.00 | 2.00 |
| CNR165 | 90.80 | 3.14  | 2.36 | 3.70 |

Table 2.S: LOD values in ppm for Zn, Pb, and Sn in case of LIBS and WELIBS at IR, Green, and UV laser wavelengths:

|    | IR     |      | Green  |       | UV     |      |
|----|--------|------|--------|-------|--------|------|
|    | WELIBS | LIBS | WELIBS | LIBS  | WELIBS | LIBS |
| Zn | 15     | 44   | 11.1   | 47.59 | 7      | 14   |
| Pb | 16.5   | 20   | 14.32  | 32.7  | 16     | 22   |
| Sn | 16.2   | 23   | 15.7   | 31    | 7      | 13   |
